# Supplementary material for: HSCCC-based strategy for preparative separation of in vivo metabolites after administration of an herbal medicine: Saussurea laniceps, a case study
Source: PubMed Central journal article supplement (PMC5020495; doi:10.1038/srep33036), 2016-09-13
Supplement: srep33036-s1.pdf [file srep33036-s1.pdf]

# **HSCCC-based strategy for preparative separation of *in vivo* metabolites after administration of an herbal medicine: *Saussurea laniceps*, a case study**

Tao Yi<sup>1,2</sup>, Lin Zhu<sup>1</sup>, Guo-Yuan Zhu<sup>3</sup>, Yi-Na Tang<sup>1,2</sup>, Jun Xu<sup>1,2</sup>, Jia-Yi Fan<sup>1</sup>, Zhong-Zhen Zhao<sup>1,2</sup> & Hu-Biao Chen<sup>1,2</sup>

## **Affiliation**

<sup>1</sup> School of Chinese Medicine, Hong Kong Baptist University, Kowloon Tong, Hong Kong Special Administrative Region, China;

<sup>2</sup> Institute of Research and Continuing Education (Shenzhen), Hong Kong Baptist University, Shenzhen, China;

<sup>3</sup> State Key Laboratory of Quality Research in Chinese Medicine, Macau University of Science and Technology, Taipa, Macau Special Administrative Region, China.

## **Corresponding**

Correspondence and requests for materials should be addressed to T.Y. (yitao@hkbu.edu.hk) or H.B.C. (hbchen@hkbu.edu.hk)

## **Legends for Supplementary Information**

**Figure S1.**  $^1\text{H}$ -NMR spectrum of M1.

**Figure S2.**  $^{13}\text{C}$ -NMR spectrum of M1.

**Figure S3.**  $^1\text{H}$ -NMR spectrum of M2.

**Figure S4.**  $^{13}\text{C}$ -NMR spectrum of M2.

**Figure S5.**  $^1\text{H}$ -NMR spectrum of M3.

**Figure S6.**  $^{13}\text{C}$ -NMR spectrum of M3.

**Figure S7.**  $^1\text{H}$ -NMR spectrum of M4.

**Figure S8.**  $^{13}\text{C}$ -NMR spectrum of M4.

**Figure S9.** +MS spectra (**A**) and +MS/MS spectra (**B**) of M1.

**Figure S10.** +MS spectra (**A**) and +MS/MS spectra (**B**) of M2.

**Figure S11.** +MS spectra (**A**) and +MS/MS spectra (**B**) of M3.

**Figure S12.** +MS spectra (**A**) and +MS/MS spectra (**B**) of M4.

1 H

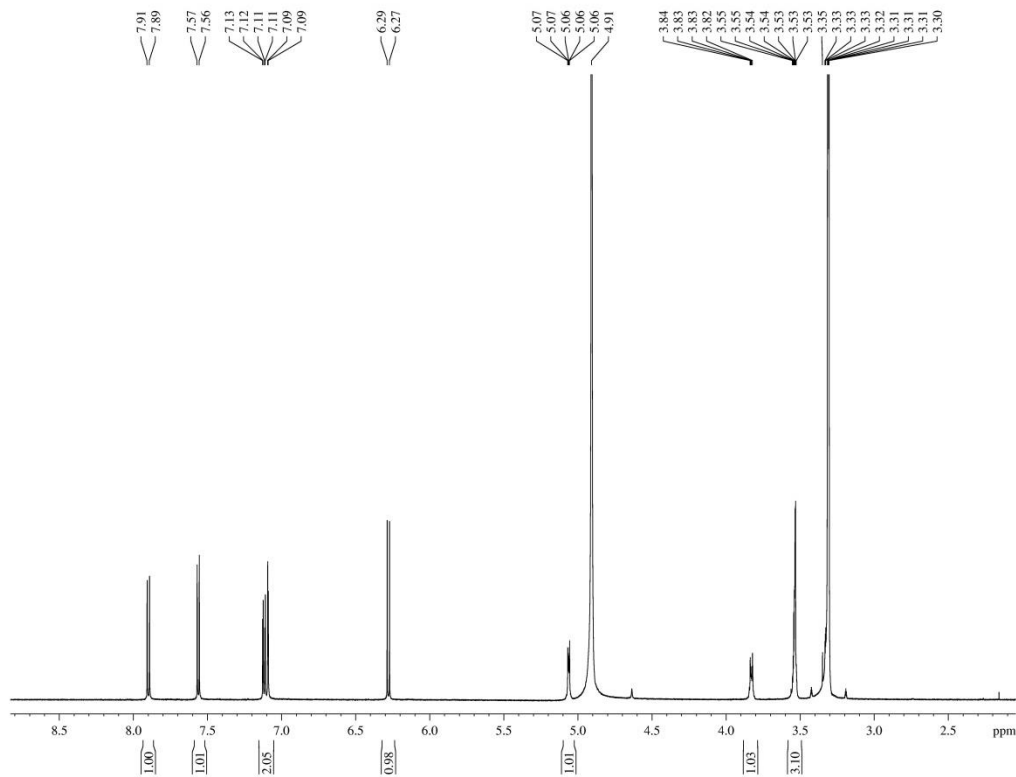

Figure S1. <sup>1</sup>H-NMR spectrum of M1.

13 C

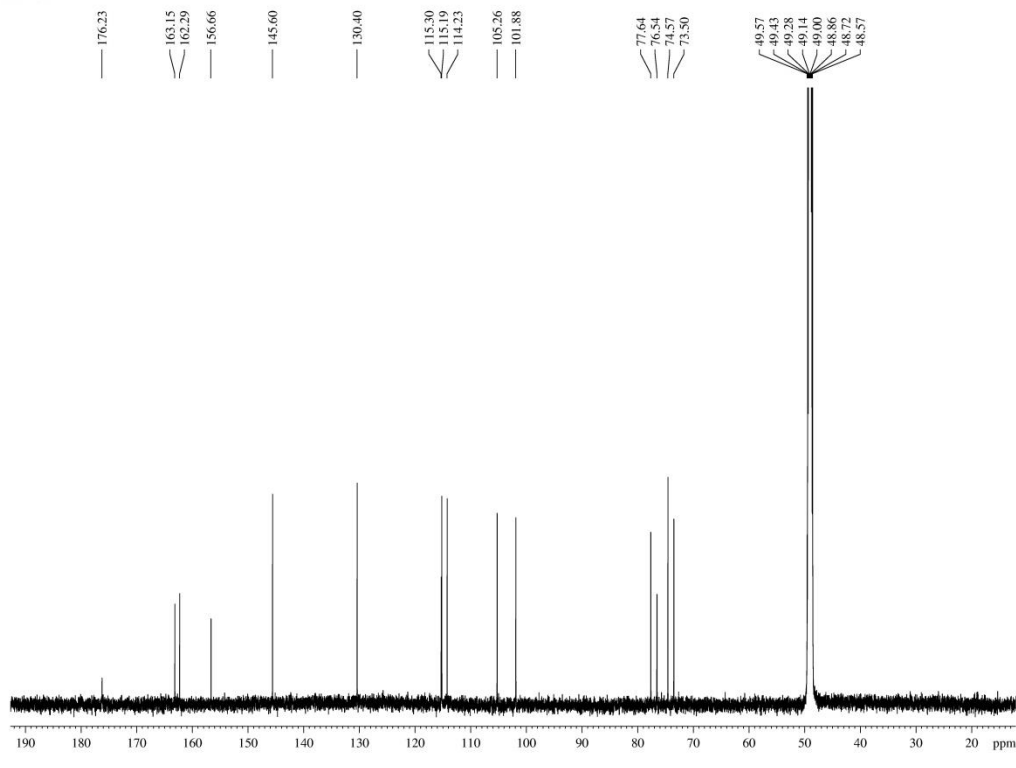

Figure S2. <sup>13</sup>C-NMR spectrum of M1.

1 H

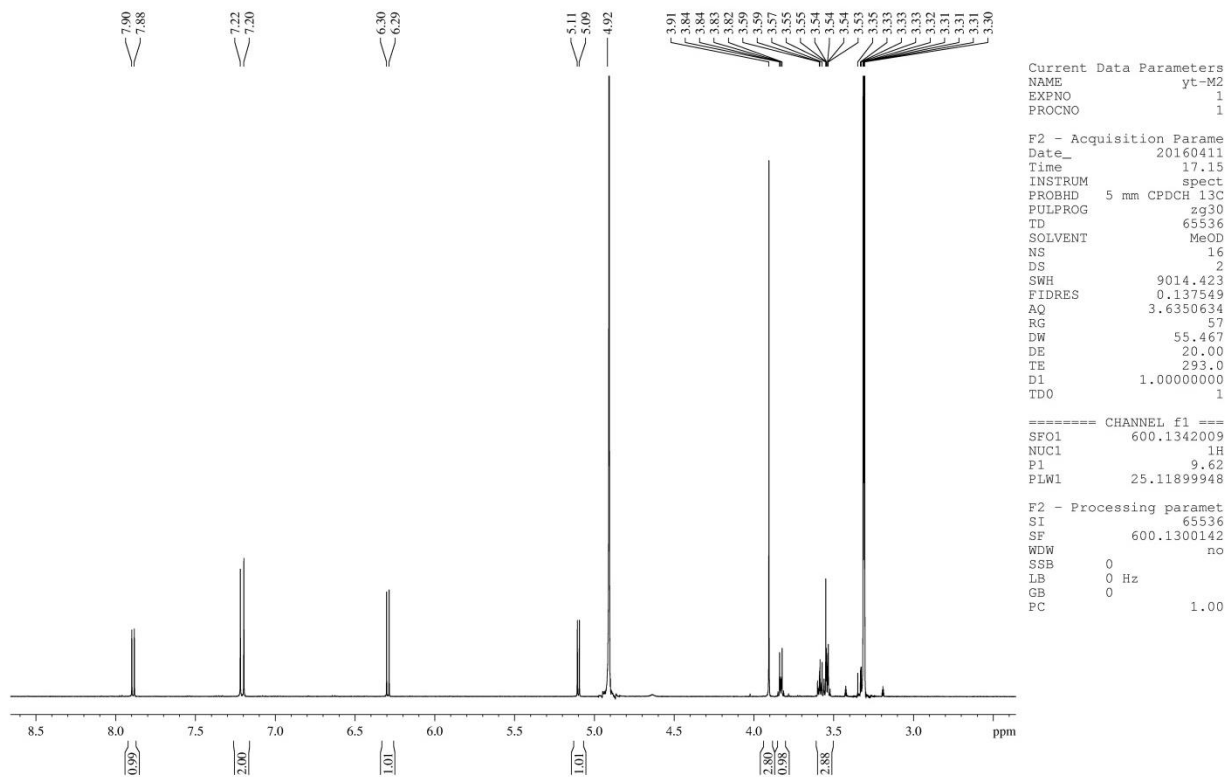

Figure S3. <sup>1</sup>H-NMR spectrum of M2.

13 C

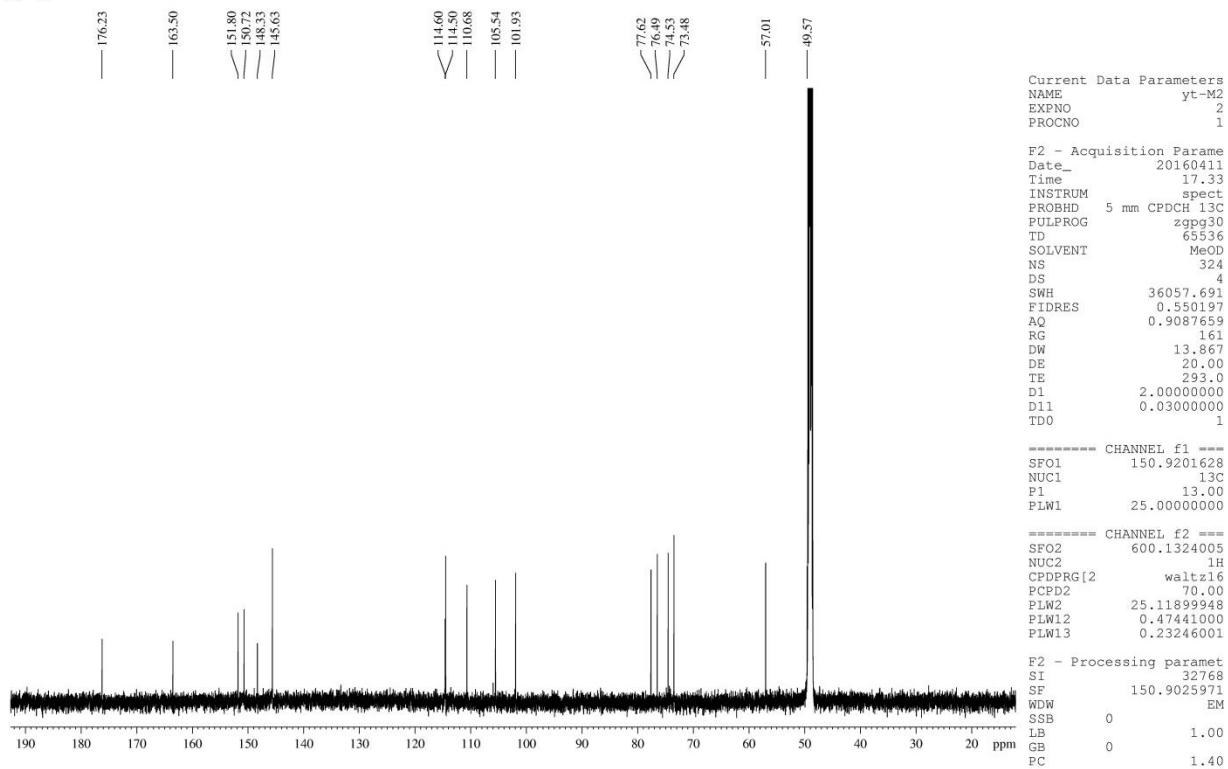

Figure S4. <sup>13</sup>C-NMR spectrum of M2.

1 H

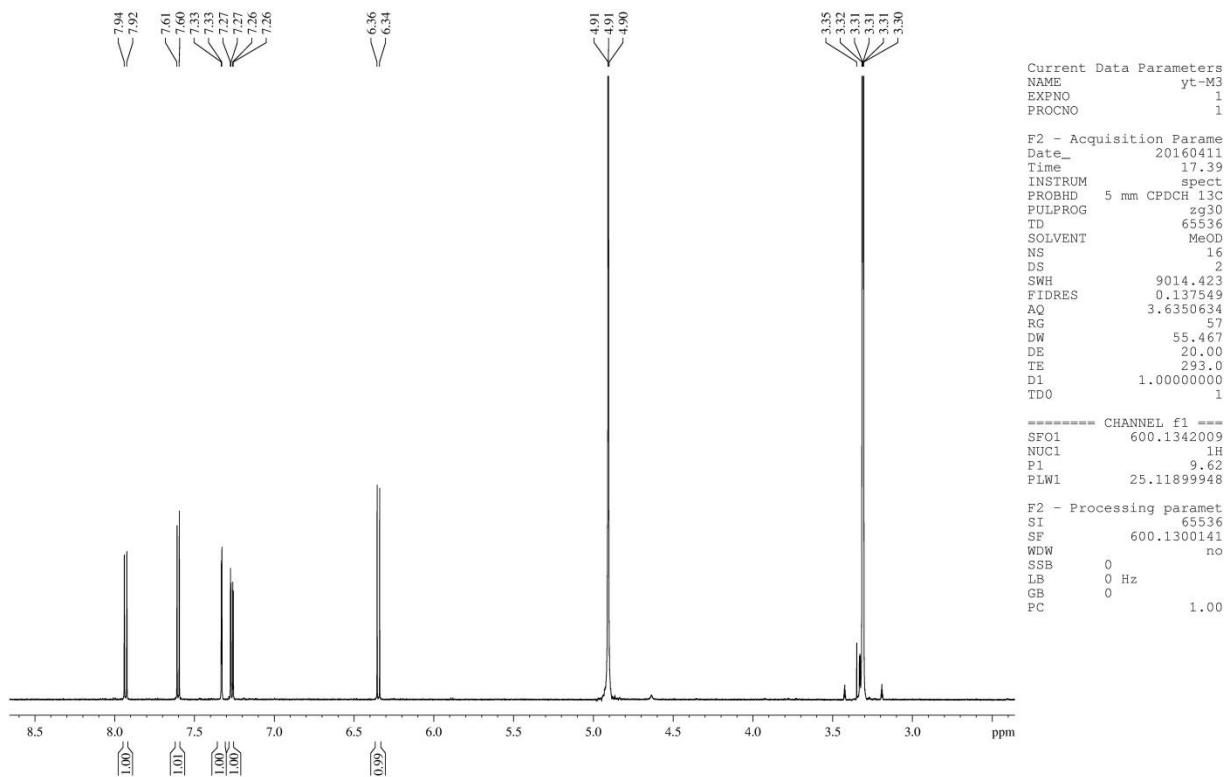

Figure S5. <sup>1</sup>H-NMR spectrum of M3.

13 C

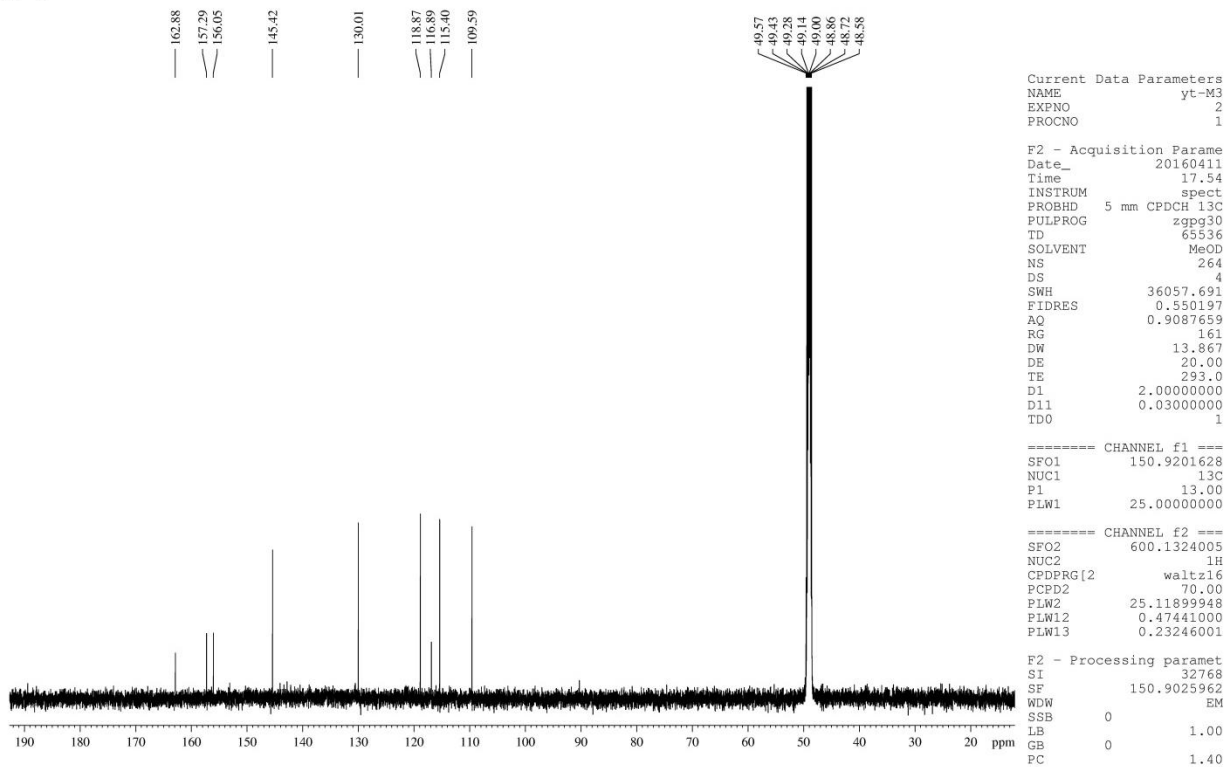

Figure S6. <sup>13</sup>C-NMR spectrum of M3.

1 H

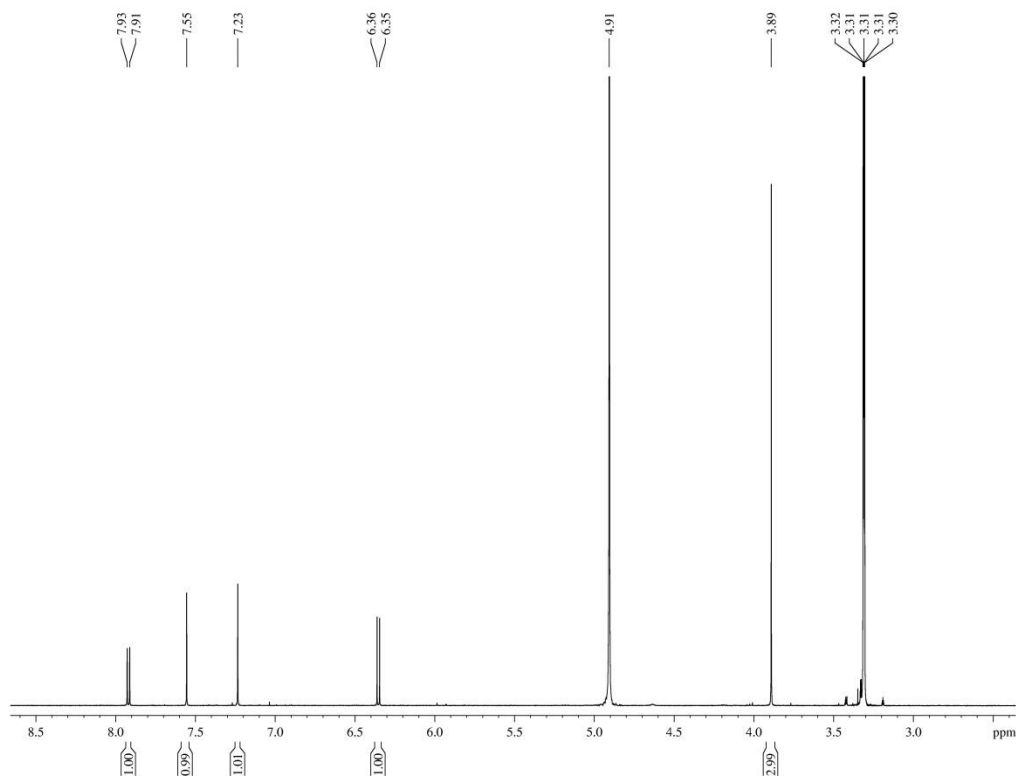

Figure S7. <sup>1</sup>H-NMR spectrum of M4.

13 C

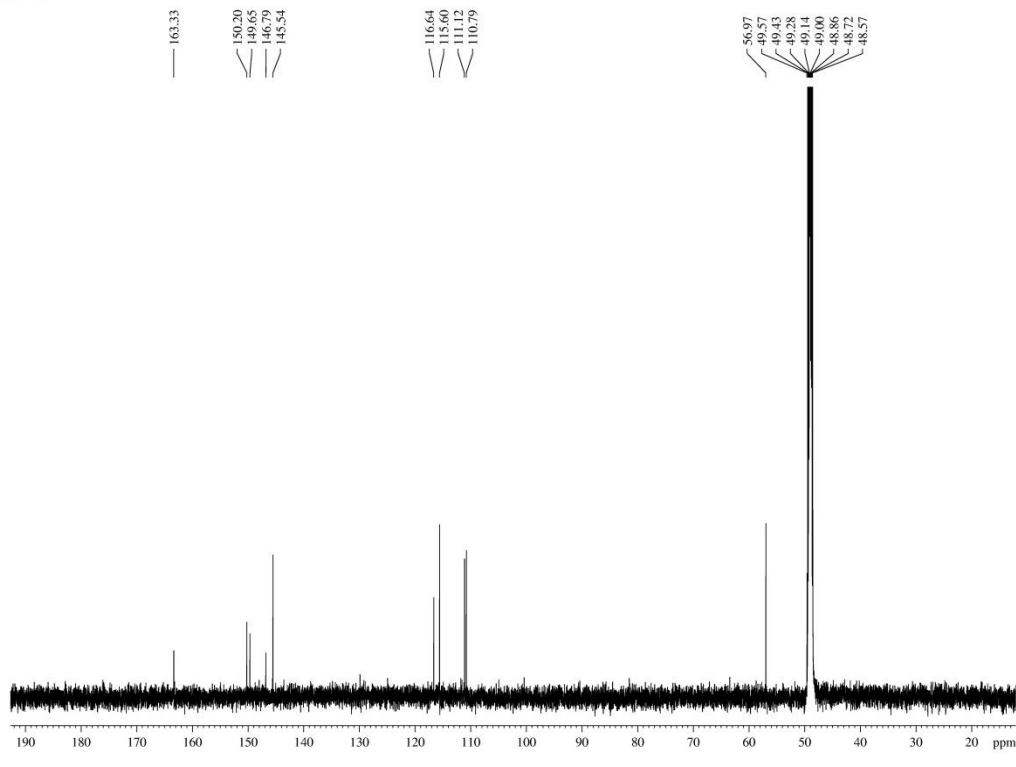

Figure S8. <sup>13</sup>C-NMR spectrum of M4.

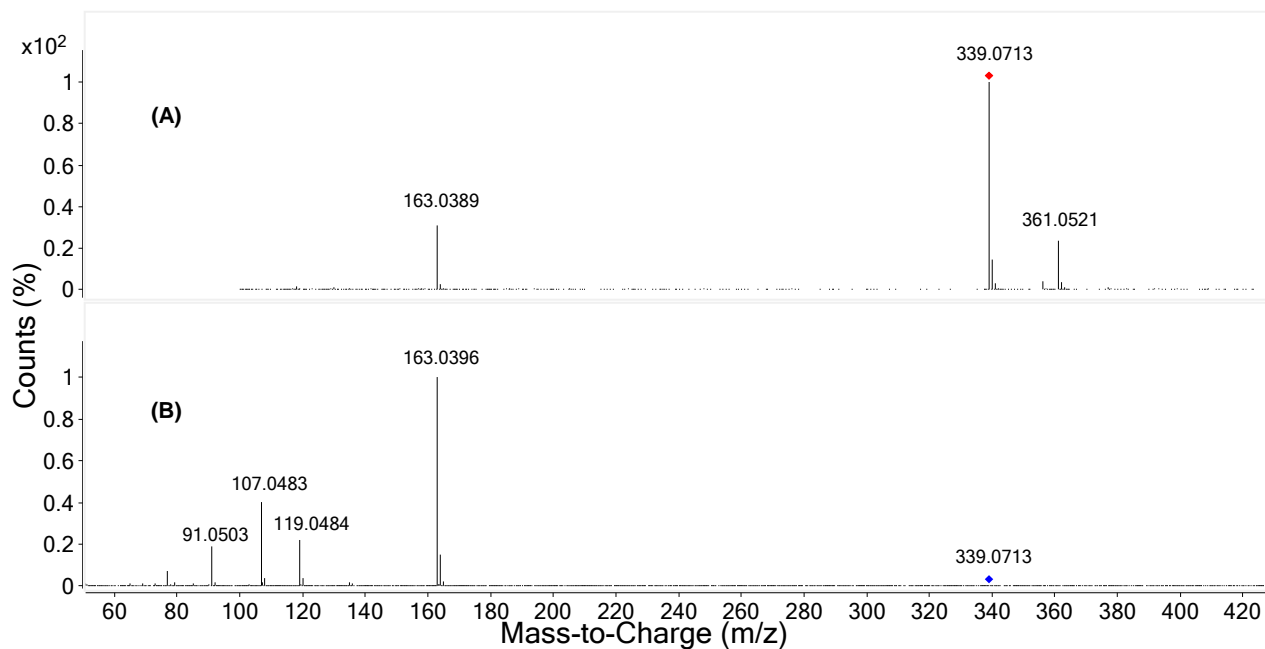

**Figure S9.** +MS spectra (A) and +MS/MS spectra (B) of M1.

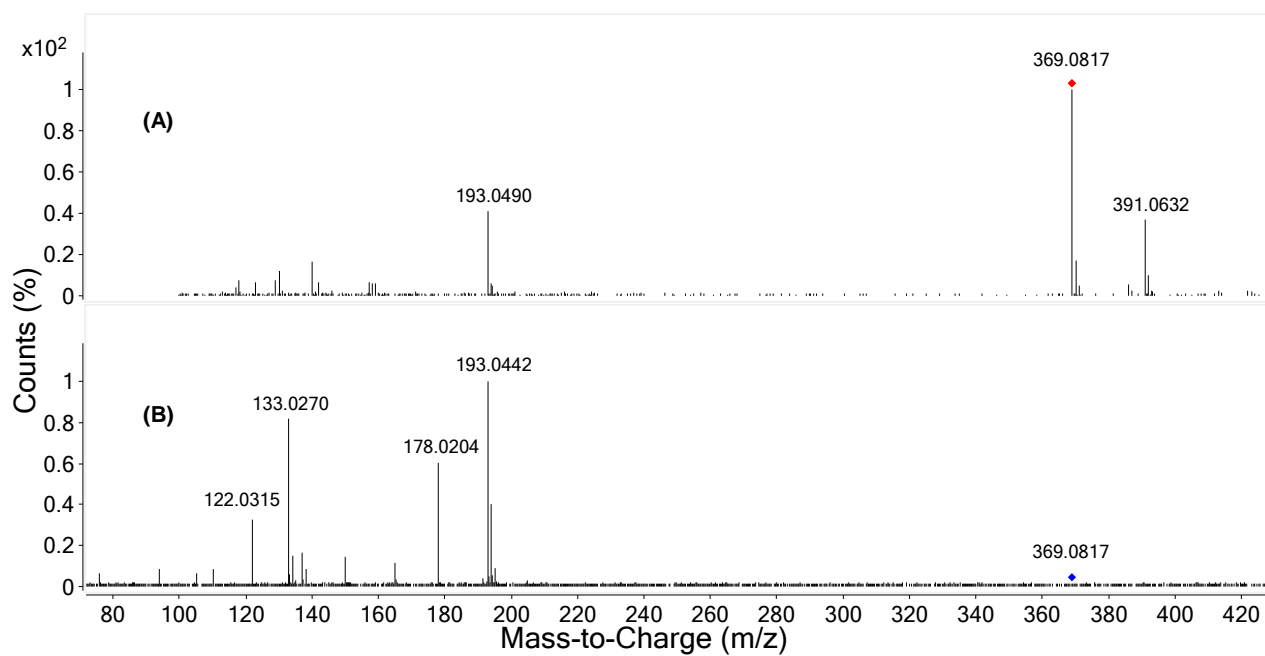

**Figure S10.** +MS spectra (A) and +MS/MS spectra (B) of M2.

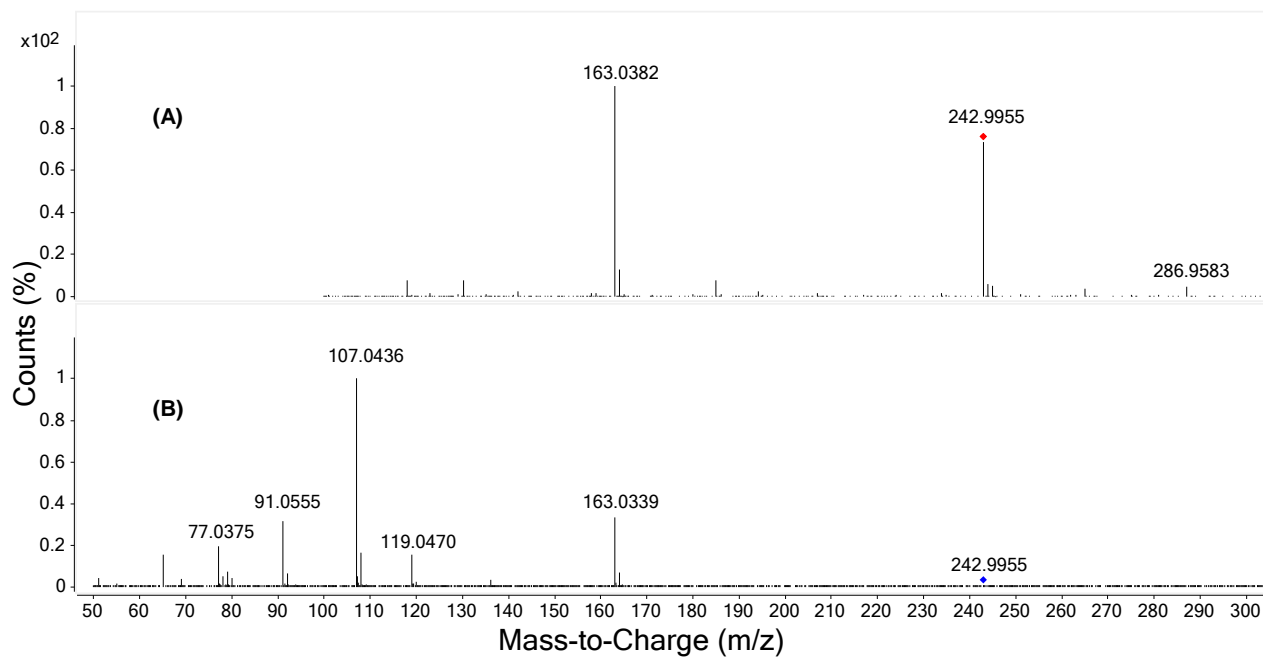

**Figure S11.** +MS spectra (A) and +MS/MS spectra (B) of M3.

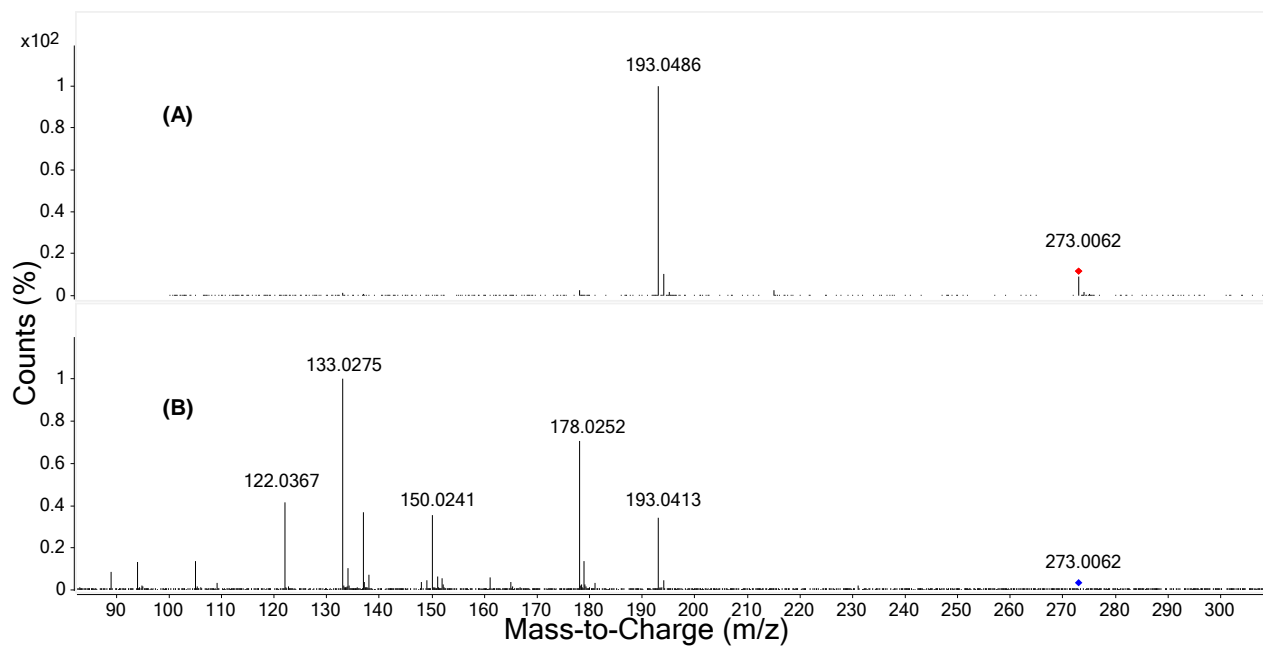

**Figure S12.** +MS spectra (A) and +MS/MS spectra (B) of M4.

(The end)
